# Supplementary material
Source: bioRxiv or medRxiv preprint supplement (https://www.biorxiv.org/highwire/filestream/30578/field_highwire_adjunct_files/6/106948-7.pdf)
Supplement: Supplementary file [file 106948-7.pdf]

**Supplementary Table S7.** Enrichment and depletion levels within positively-selected great ape genes**Germ Layers**

| Name     | Enrichment ratio | Observed | Expected    |
|----------|------------------|----------|-------------|
| ectoderm | 1.035696961      | 156      | 150.6232092 |
| mesoderm | 1.015594352      | 158      | 155.5739255 |
| endoderm | 0.934907138      | 112      | 119.7979943 |

**Organs**

| Name                      | Enrichment ratio | Observed | Expected    |
|---------------------------|------------------|----------|-------------|
| spinal cord               | 1.148485062      | 70       | 60.94985673 |
| diaphragm                 | 1.143616537      | 18       | 15.73954155 |
| cranial nerve             | 1.123498635      | 87       | 77.43667622 |
| peripheral nervous system | 1.095994886      | 112      | 102.1902579 |
| peripheral nerve          | 1.091856668      | 82       | 75.10143266 |
| cerebellum                | 1.078981692      | 64       | 59.31518625 |
| abdominal wall            | 1.077079904      | 33       | 30.63839542 |
| eye                       | 1.056066282      | 113      | 107.0008596 |
| sinuses                   | 1.053002112      | 6        | 5.697994269 |
| head                      | 1.028779555      | 149      | 144.8318052 |
| brain                     | 1.009602095      | 135      | 133.7160458 |
| mouth                     | 0.990427662      | 89       | 89.86017192 |
| skull                     | 0.988863429      | 92       | 93.03610315 |
| lower limb                | 0.985571728      | 98       | 99.43467049 |
| outer ear                 | 0.983924051      | 46       | 46.75157593 |
| middle ear                | 0.980658455      | 24       | 24.47335244 |
| inner ear                 | 0.973229225      | 12       | 12.33008596 |
| pharynx                   | 0.970288955      | 30       | 30.91862464 |
| maxilla                   | 0.969224166      | 66       | 68.09570201 |
| mandible                  | 0.967233973      | 66       | 68.23581662 |
| jaw                       | 0.963935085      | 66       | 68.46934097 |
| placenta                  | 0.959805373      | 13       | 13.54441261 |
| forehead                  | 0.959061274      | 40       | 41.70744986 |
| foot                      | 0.953306416      | 87       | 91.26131805 |

|                   |             |    |             |
|-------------------|-------------|----|-------------|
| chin              | 0.947137288 | 33 | 34.84183381 |
| stomach           | 0.94681999  | 44 | 46.4713467  |
| elbow             | 0.938614786 | 53 | 56.46618911 |
| esophagus         | 0.934300056 | 36 | 38.53151862 |
| upper limb        | 0.929521325 | 87 | 93.5965616  |
| hair              | 0.928338578 | 47 | 50.62808023 |
| spinal column     | 0.922167081 | 55 | 59.64212034 |
| neck              | 0.918625605 | 65 | 70.75787966 |
| knee              | 0.913675746 | 53 | 58.00744986 |
| lymph nodes       | 0.907247582 | 10 | 11.02234957 |
| lung              | 0.907031056 | 71 | 78.2773639  |
| kidney            | 0.899884414 | 58 | 64.45272206 |
| wrist             | 0.895051795 | 51 | 56.97994269 |
| ankle             | 0.894995364 | 52 | 58.1008596  |
| hip               | 0.892842208 | 52 | 58.24097421 |
| face              | 0.891631439 | 75 | 84.11547278 |
| ear               | 0.889244977 | 90 | 101.2094556 |
| shoulder          | 0.877363462 | 52 | 59.26848138 |
| epiglottis        | 0.876475442 | 7  | 7.986532951 |
| blood vessels     | 0.867372994 | 73 | 84.16217765 |
| hand              | 0.864743253 | 75 | 86.73094556 |
| white blood cells | 0.854163947 | 45 | 52.68309456 |
| chest wall        | 0.851260134 | 46 | 54.03753582 |
| blood             | 0.849195252 | 75 | 88.31891117 |
| nose              | 0.846565125 | 48 | 56.69971347 |
| skin              | 0.845414571 | 92 | 108.8223496 |
| rib               | 0.844227364 | 47 | 55.6722063  |
| rib cage          | 0.844227364 | 47 | 55.6722063  |
| lips              | 0.843323354 | 36 | 42.68825215 |
| heart             | 0.838198572 | 68 | 81.12636103 |
| olfactory bulb    | 0.828051385 | 7  | 8.453581662 |
| pelvis            | 0.827398347 | 49 | 59.2217765  |
| toes              | 0.825425721 | 66 | 79.95873926 |

|                    |             |    |             |
|--------------------|-------------|----|-------------|
| lacrimal apparatus | 0.823501652 | 5  | 6.071633238 |
| intestine          | 0.822064476 | 44 | 53.52378223 |
| vertebrae          | 0.815321172 | 46 | 56.41948424 |
| fingers            | 0.813545673 | 66 | 81.12636103 |
| larynx             | 0.810378119 | 19 | 23.44584527 |
| digit              | 0.806374299 | 67 | 83.08796562 |
| eyelid             | 0.802245572 | 45 | 56.09255014 |
| teeth              | 0.789104777 | 30 | 38.01776504 |
| fibula             | 0.780734163 | 33 | 42.26790831 |
| pancreas           | 0.780610941 | 28 | 35.86934097 |
| urethra            | 0.776093241 | 17 | 21.90458453 |
| tibia              | 0.771358534 | 33 | 42.78166189 |
| bronchus           | 0.771034787 | 13 | 16.86045845 |
| scalp              | 0.761281527 | 8  | 10.50859599 |
| adrenal gland      | 0.760501525 | 13 | 17.09398281 |
| breast             | 0.760392179 | 19 | 24.98710602 |
| heart valve        | 0.756956064 | 35 | 46.23782235 |
| forearm            | 0.751958994 | 38 | 50.53467049 |
| nail               | 0.746440029 | 19 | 25.45415473 |
| sternum            | 0.745876496 | 34 | 45.58395415 |
| vocal cords        | 0.744731929 | 12 | 16.11318052 |
| femur              | 0.742074883 | 34 | 45.81747851 |
| large intestine    | 0.739061381 | 34 | 46.00429799 |
| scapula            | 0.736724058 | 32 | 43.43553009 |
| radius             | 0.733568923 | 32 | 43.62234957 |
| shin               | 0.731108783 | 35 | 47.87249284 |
| ulna               | 0.725030026 | 32 | 44.13610315 |
| thigh              | 0.723074621 | 36 | 49.78739255 |
| bone marrow        | 0.721720549 | 15 | 20.78366762 |
| cheek              | 0.719027562 | 18 | 25.03381089 |
| humerus            | 0.710003497 | 32 | 45.07020057 |
| testis             | 0.707803073 | 32 | 45.21031519 |
| uterus             | 0.705304944 | 28 | 39.6991404  |

|                     |             |    |             |
|---------------------|-------------|----|-------------|
| sweat gland         | 0.700088598 | 12 | 17.14068768 |
| penis               | 0.694412204 | 24 | 34.56160458 |
| clavicle            | 0.693565654 | 31 | 44.6965616  |
| trachea             | 0.684655443 | 11 | 16.06647564 |
| salivary gland      | 0.684371236 | 7  | 10.22836676 |
| spleen              | 0.679715649 | 18 | 26.48166189 |
| aorta               | 0.672918493 | 11 | 16.34670487 |
| arm                 | 0.662587536 | 35 | 52.82320917 |
| lymph vessels       | 0.65544009  | 3  | 4.577077364 |
| coagulation system  | 0.63913561  | 26 | 40.67994269 |
| ovary               | 0.634124965 | 17 | 26.80859599 |
| small intestine     | 0.62760667  | 26 | 41.42722063 |
| tongue              | 0.627101676 | 14 | 22.32492837 |
| red blood cells     | 0.61040254  | 26 | 42.59484241 |
| urinary bladder     | 0.58749813  | 18 | 30.63839542 |
| rectum              | 0.584755375 | 13 | 22.23151862 |
| liver               | 0.577636051 | 30 | 51.93581662 |
| vagina              | 0.572487779 | 15 | 26.20143266 |
| ureter              | 0.572307752 | 17 | 29.70429799 |
| pituitary gland     | 0.543033698 | 14 | 25.78108883 |
| biliary tract       | 0.528667727 | 10 | 18.91547278 |
| anus                | 0.520106306 | 6  | 11.53610315 |
| meninges            | 0.513549001 | 13 | 25.31404011 |
| gallbladder         | 0.512225908 | 5  | 9.761318052 |
| duodenum            | 0.447617623 | 6  | 13.40429799 |
| vulva               | 0.444007803 | 9  | 20.26991404 |
| cerebrospinal fluid | 0.344413559 | 6  | 17.42091691 |
| prostate            | 0.311811305 | 6  | 19.24240688 |
| fallopian tube      | 0.303702737 | 2  | 6.585386819 |
| thyroid             | 0.298411748 | 4  | 13.40429799 |
| thymus              | 0.235286186 | 1  | 4.250143266 |
| hypothalamus        | 0.198250398 | 2  | 10.08825215 |
| vas deferens        | 0.133819018 | 1  | 7.47277937  |

|             |   |   |             |
|-------------|---|---|-------------|
| appendix    | 0 | 0 | 1.961604585 |
| parathyroid | 0 | 0 | 3.08252149  |

### Body Regions

| Name          | Enrichment ratio | Observed | Expected    |
|---------------|------------------|----------|-------------|
| head and neck | 1.038395387      | 155      | 149.2687679 |
| thorax        | 1.017971001      | 121      | 118.8638968 |
| non-specific  | 1.008827814      | 152      | 150.669914  |
| limbs         | 1.00666748       | 104      | 103.3111748 |
| abdomen       | 0.955501916      | 98       | 102.5638968 |
| pelvis        | 0.866587128      | 82       | 94.62406877 |

### Body Systems

| Name            | Enrichment ratio | Observed | Expected    |
|-----------------|------------------|----------|-------------|
| skeletal muscle | 1.070127493      | 126      | 117.7429799 |
| nervous         | 1.041848167      | 147      | 141.0954155 |
| skeleton        | 1.029377065      | 115      | 111.7180516 |
| immune          | 0.926996447      | 72       | 77.67020057 |
| respiratory     | 0.917776017      | 82       | 89.34641834 |
| integumentary   | 0.896234531      | 100      | 111.577937  |
| urinary         | 0.865786717      | 63       | 72.76618911 |
| cardiovascular  | 0.852180814      | 88       | 103.2644699 |
| digestive       | 0.841890524      | 81       | 96.21203438 |
| lymphatic       | 0.840678987      | 32       | 38.06446991 |
| endocrine       | 0.785541557      | 39       | 49.64727794 |
| reproductive    | 0.715191414      | 48       | 67.11489971 |

| P-value     | FDR         |
|-------------|-------------|
| 0.056221919 | 0.168665756 |
| 0.196648329 | 0.294972494 |
| 0.080698167 | 0.2420945   |

| P-value     | FDR         |
|-------------|-------------|
| 0.071060135 | 0.999948914 |
| 0.271544661 | 0.999948914 |
| 0.065507816 | 0.999948914 |
| 0.053804594 | 0.999948914 |
| 0.137384953 | 0.999948914 |
| 0.220415564 | 0.999948914 |
| 0.312896868 | 0.999948914 |
| 0.15968616  | 0.999948914 |
| 0.429788662 | 0.999948914 |
| 0.152865374 | 0.999948914 |
| 0.402937422 | 0.999948914 |
| 0.444067998 | 0.504141591 |
| 0.432250882 | 0.496660622 |
| 0.40508983  | 0.473235783 |
| 0.451617931 | 0.504141591 |
| 0.467182795 | 0.516795127 |
| 0.475605131 | 0.521496854 |
| 0.433088063 | 0.496660622 |
| 0.368411178 | 0.447100944 |
| 0.359883428 | 0.445400282 |
| 0.34583318  | 0.432291475 |
| 0.451710865 | 0.504141591 |
| 0.381984809 | 0.45474382  |
| 0.245792266 | 0.330365949 |

|             |             |
|-------------|-------------|
| 0.365474802 | 0.447100944 |
| 0.334343449 | 0.42645848  |
| 0.2819763   | 0.371021447 |
| 0.321286767 | 0.414029339 |
| 0.143139206 | 0.221826407 |
| 0.267482723 | 0.35569511  |
| 0.22136627  | 0.304074546 |
| 0.176596985 | 0.25084799  |
| 0.202192747 | 0.283978577 |
| 0.387645336 | 0.457128934 |
| 0.121948439 | 0.20057309  |
| 0.145518123 | 0.221826407 |
| 0.158020334 | 0.227040709 |
| 0.154183454 | 0.22701432  |
| 0.14873977  | 0.224005677 |
| 0.072355732 | 0.138039539 |
| 0.033238587 | 0.086558819 |
| 0.112852362 | 0.18808727  |
| 0.375617876 | 0.451463793 |
| 0.037033732 | 0.090768951 |
| 0.030172211 | 0.080245241 |
| 0.093346726 | 0.159840285 |
| 0.084859221 | 0.151534323 |
| 0.016426152 | 0.055411443 |
| 0.070776562 | 0.138039539 |
| 0.00251124  | 0.024146536 |
| 0.070486521 | 0.138039539 |
| 0.070486521 | 0.138039539 |
| 0.110785149 | 0.187137076 |
| 0.017731662 | 0.055411443 |
| 0.31492963  | 0.410064622 |
| 0.043257976 | 0.098313582 |
| 0.012584167 | 0.052611289 |

|             |             |
|-------------|-------------|
| 0.345506715 | 0.432291475 |
| 0.050777684 | 0.11135457  |
| 0.038410391 | 0.09233267  |
| 0.007649741 | 0.043699159 |
| 0.155976387 | 0.22701432  |
| 0.004975519 | 0.035301082 |
| 0.029421632 | 0.079950086 |
| 0.062198978 | 0.129581204 |
| 0.042941285 | 0.098313582 |
| 0.061663778 | 0.129581204 |
| 0.12389817  | 0.201133393 |
| 0.035268173 | 0.088170432 |
| 0.156185852 | 0.22701432  |
| 0.213368569 | 0.296345235 |
| 0.142578355 | 0.221826407 |
| 0.089227318 | 0.154908539 |
| 0.021070127 | 0.062461469 |
| 0.013576736 | 0.054006817 |
| 0.074276097 | 0.138574807 |
| 0.017540966 | 0.055411443 |
| 0.134669523 | 0.215816543 |
| 0.015868925 | 0.055411443 |
| 0.01463361  | 0.055411443 |
| 0.017197898 | 0.055411443 |
| 0.015855362 | 0.055411443 |
| 0.010391856 | 0.049960845 |
| 0.012626709 | 0.052611289 |
| 0.007138532 | 0.043699159 |
| 0.079236945 | 0.14565615  |
| 0.055455807 | 0.119516826 |
| 0.008217151 | 0.044658428 |
| 0.007691052 | 0.043699159 |
| 0.012510549 | 0.052611289 |



|             |             |
|-------------|-------------|
| 0.086542544 | 0.152363633 |
| 0.01664327  | 0.055411443 |
| 0.005750768 | 0.037833998 |
| 0.08315186  | 0.150637427 |
| 0.144134773 | 0.221826407 |
| 0.028986709 | 0.079950086 |
| 0.072884877 | 0.138039539 |
| 0.00084672  | 0.019284676 |
| 0.237122717 | 0.322177604 |
| 0.002406692 | 0.024146536 |
| 0.013825745 | 0.054006817 |
| 0.001589097 | 0.022070786 |
| 0.021997693 | 0.062493445 |
| 0.000810018 | 0.019284676 |
| 0.003278071 | 0.025609928 |
| 0.011975919 | 0.052611289 |
| 4.24424E-05 | 0.005305302 |
| 0.005083356 | 0.035301082 |
| 0.00276784  | 0.024712853 |
| 0.00309402  | 0.025609928 |
| 0.009107227 | 0.047433476 |
| 0.03499293  | 0.088170432 |
| 0.001858942 | 0.022949994 |
| 0.046833593 | 0.104539271 |
| 0.01027763  | 0.049960845 |
| 0.00154667  | 0.022070786 |
| 0.000515444 | 0.019284676 |
| 0.000116211 | 0.007263198 |
| 0.021486745 | 0.062461469 |
| 0.001079942 | 0.019284676 |
| 0.039959822 | 0.094244862 |
| 0.001019368 | 0.019284676 |
| 0.0020196   | 0.022949994 |

|             |             |
|-------------|-------------|
| 0.066256339 | 0.135771187 |
| 0.020640927 | 0.062461469 |

| P-value     | FDR         |
|-------------|-------------|
| 0.052430458 | 0.31458275  |
| 0.356081773 | 0.685797356 |
| 0.359492949 | 0.685797356 |
| 0.457198237 | 0.685797356 |
| 0.224215127 | 0.672645382 |
| 0.020865795 | 0.125194768 |

| P-value     | FDR         |
|-------------|-------------|
| 0.071770663 | 0.518985122 |
| 0.08649752  | 0.518985122 |
| 0.290811466 | 0.999110383 |
| 0.182057346 | 0.242743128 |
| 0.119065676 | 0.187525213 |
| 0.024587544 | 0.072536518 |
| 0.057530917 | 0.115061834 |
| 0.006139336 | 0.028030313 |
| 0.007007578 | 0.028030313 |
| 0.125016808 | 0.187525213 |
| 0.030223549 | 0.072536518 |
| 0.000793983 | 0.009527793 |
